# Supplementary material
Source: HighWire-hosted journal article supplement (https://bmjopenquality.bmj.com/highwire/filestream/136037/field_highwire_adjunct_files/1/ds1834.docx)
Supplement: ds1834.docx [file ds1834.docx]

**PDSA Cycle [1]**

**Aim:** what are you trying to accomplish?

An improvement in the number of Well’s scores calculated in cases of suspected PE. A reduction in the number of unnecessary investigations in cases of suspected PE.

**Plan:** what will your test be?

To place some 2-level Well’s score proforma’s in the Emergency assessment unit for doctors to fill in when admitting a case of suspected PE.

**Prediction:** what do you think will happen as a result of your test?

I predicted that more doctors would use this proforma, adhere more closely to the guideline and ultimately target their investigation appropriately.

**Do:** what happened when you carried out your test?

The proforma’s were ignored as extra unnecessary paperwork during admission.

**Study:** how did the results of your test compare with predictions?

The results were much poorer than predicted.

**Act:** how will you change your previous test in light of what you have learned?

This test demonstrated the need for education when introducing a new initiative. The next PDSA cycle will involve education followed by providing a sample of the proforma to use as a guide when calculating a Well’s score.
